# Supplementary material for: Extended surveillance to assess safety of 9-valent human papillomavirus vaccine
Source: PubMed Central journal article supplement — Hum Vaccin Immunother. 2022 Dec 28;18(7):2159215. doi: 10.1080/21645515.2022.2159215 (PMC9891676; doi:10.1080/21645515.2022.2159215), 2022-12-28
Supplement: KHVI_A_2159215_SM3139.pdf [file KHVI_A_2159215_SM3139.pdf]

1 **Supplemental Table 1.** ICD codes used to define instances of GBS, CIDP, and stroke.

| Adverse event     | ICD-9 code | ICD-10 code                                                      | ICD-10 code description                                         |                                                                                      |
|-------------------|------------|------------------------------------------------------------------|-----------------------------------------------------------------|--------------------------------------------------------------------------------------|
| GBS <sup>a</sup>  | 357.0      | G61.0                                                            | Guillain-Barré syndrome                                         |                                                                                      |
| CIDP <sup>b</sup> | 357.81     | G61.81                                                           | Chronic inflammatory demyelinating polyneuritis                 |                                                                                      |
| Stroke            | 435.*      | G45.0                                                            | Vertebro-basilar artery syndrome                                |                                                                                      |
|                   |            | G45.1                                                            | Carotid artery syndrome (hemispheric)                           |                                                                                      |
|                   |            | G45.2                                                            | Multiple and bilateral precerebral artery syndromes             |                                                                                      |
|                   |            | G45.8                                                            | Other transient cerebral ischemic attacks and related syndromes |                                                                                      |
|                   |            | G45.9                                                            | Transient cerebral ischemic attack, unspecified                 |                                                                                      |
|                   |            | G46.*                                                            | Vascular syndromes of brain in cerebrovascular diseases         |                                                                                      |
|                   |            | 433.*                                                            | I63.*                                                           | Cerebral infarction                                                                  |
|                   |            | 434.*                                                            | I65.*                                                           | Occlusion and stenosis of precerebral arteries, not resulting in cerebral infarction |
|                   |            |                                                                  | I66.*                                                           | Occlusion and stenosis of cerebral arteries, not resulting in cerebral infarction    |
|                   |            | 437.0                                                            | I67.2                                                           | Cerebral atherosclerosis                                                             |
|                   |            |                                                                  | I67.81                                                          | Acute cerebrovascular insufficiency                                                  |
|                   |            |                                                                  | I67.82                                                          | Cerebral ischemia                                                                    |
|                   |            |                                                                  | I67.84*                                                         | Cerebral vasospasm and vasoconstriction                                              |
|                   |            | 436                                                              | I67.89                                                          | Other cerebrovascular disease                                                        |
|                   |            | 437.1                                                            | I67.9                                                           | Cerebrovascular disease, unspecified                                                 |
| 437.8             | I68.0      | Cerebral amyloid angiopathy                                      |                                                                 |                                                                                      |
| 437.9             | I68.8      | Other cerebrovascular disorders in diseases classified elsewhere |                                                                 |                                                                                      |

2 <sup>a</sup>Guillain-Barré syndrome

3 <sup>b</sup>Chronic inflammatory demyelinating polyneuropathy

4 \*Asterisk indicates that ICD code groupings include all subcodes.
